# Supplementary material for: Phase distribution regulation of formamidinium-based quasi-2D perovskites through solution engineering
Source: Royal Society of Chemistry journal article supplement (doi:10.1039/d4tc02231a), 2024-01-01
Supplement: d4tc02231a1.pdf [file d4tc02231a1.pdf]

## Supporting information

### Phase Distribution Regulation of Formamidinium-based Quasi-2D Perovskites through Solution Engineering

Xiao Zhang<sup>1</sup>, Lisanne Einhaus<sup>2</sup>, Annemarie Huijser<sup>2</sup>, Johan E. ten Elshof<sup>1</sup>

<sup>1</sup> Inorganic Materials Science Group, MESA+ Research Institute, University of Twente, 7500 AE Enschede, the Netherlands

<sup>2</sup> PhotoCatalytic Synthesis Group, MESA+ Research Institute, University of Twente, 7500 AE Enschede, the Netherlands

**Table S1.** Orthogonal experiments using different solvent combinations and excess doping fractions for quasi-2D perovskites (PDMA)(FA)<sub>4</sub>Pb<sub>5</sub>I<sub>16</sub>.

|                | Without additive | 10 mol% MACl         | 10 mol% NH <sub>4</sub> SCN | 10 mol% MACl + NH <sub>4</sub> SCN | 30 mol% MACl            |
|----------------|------------------|----------------------|-----------------------------|------------------------------------|-------------------------|
| DMF:DMSO = 4:1 | δ-phase          | Low surface coverage | δ-phase                     | Low surface coverage               | -                       |
| DMF:NMP = 9:1  | Minor δ-phase    | α-phase              | Minor δ-phase               | α-phase with peak split            | α-phase with peak split |

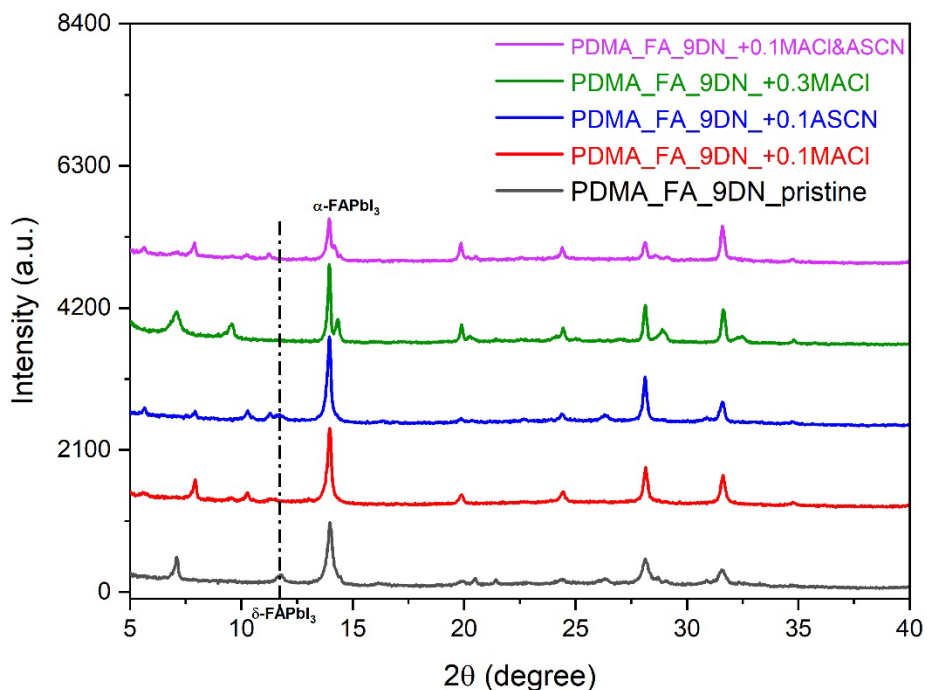

**Figure S1.** Power X-ray diffractograms of quasi-2D perovskites (PDMA)(FA)<sub>4</sub>Pb<sub>5</sub>I<sub>16</sub> with fixed solvent combination of 9:1 (v/v) DMF:NMP and different additive doping ratios.

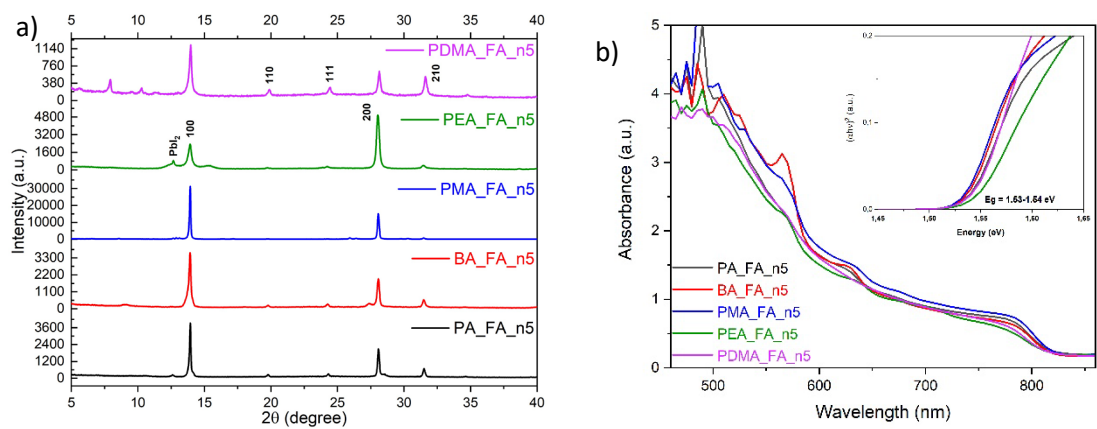

**Figure S2.** Crystal orientation and optical properties of quasi-2D perovskites  $(L)_m(\text{FA})_4\text{Pb}_5\text{I}_{16}$ ,  $L = \text{PA}, \text{BA}, \text{PMA}, \text{PEA}, \text{PDMA}$ . (a) Power X-ray diffractograms. (b) UV-Vis absorption spectra (Tauc plot in the inset).

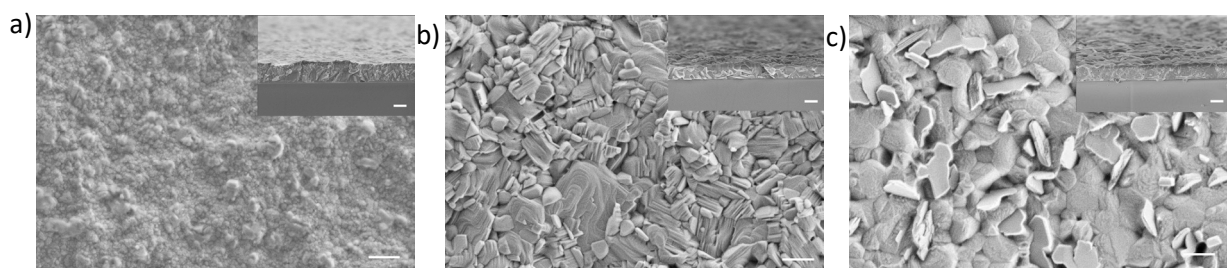

**Figure S3.** Surface morphologies of the films of  $(\text{PDMA})(\text{FA})_4\text{Pb}_5\text{I}_{16}$ ,  $(\text{PA})_2(\text{FA})_4\text{Pb}_5\text{I}_{16}$ ,  $(\text{ALA})_2(\text{FA})_4\text{Pb}_5\text{I}_{16}$ , respectively, with solvent ratios of 9:1 (v/v) DMF:NMP, and 10 mol% excess MAcl doping. Insets are the cross-sectional views, all scale bars are 500 nm.

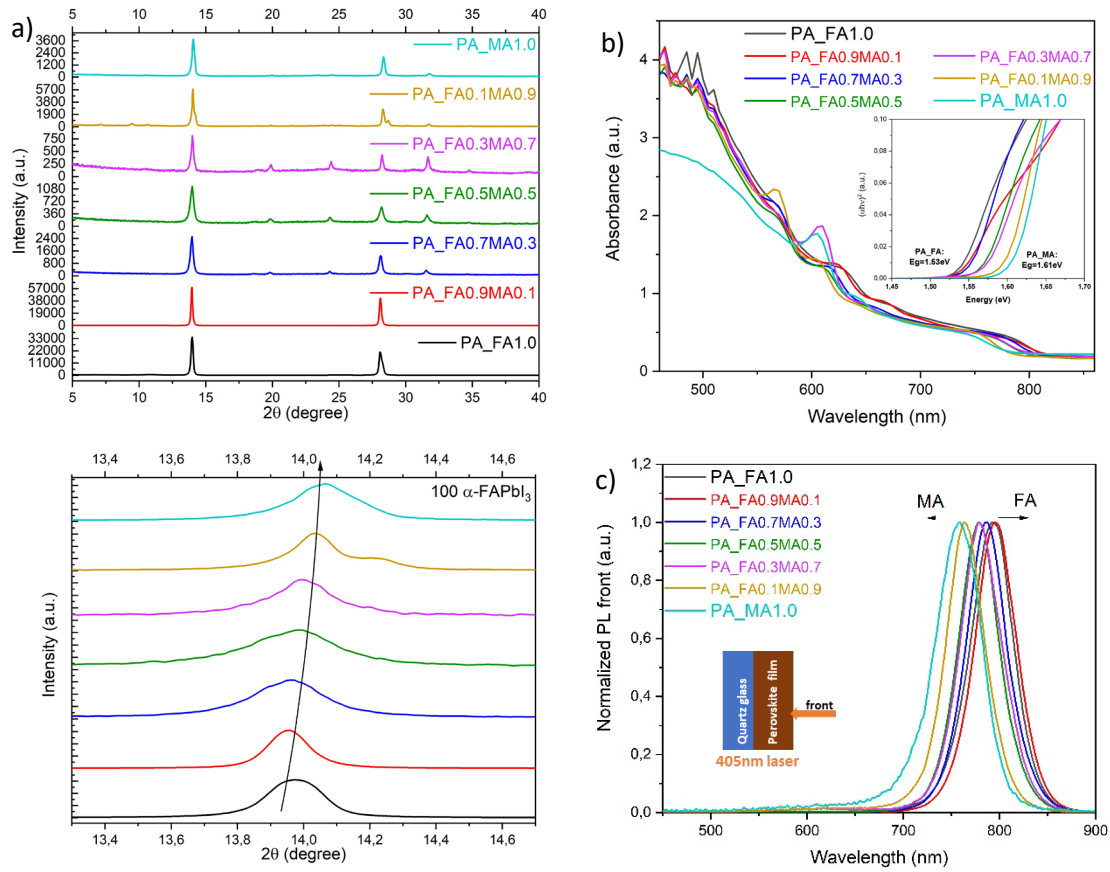

**Figure S4.** Crystalline orientation, optical properties and phase distribution of quasi-2D perovskites  $(PA)_2(FA)_4Pb_5I_{16}$  with A-site cations (FA and MA) mixing. (a) Powder X-ray diffractograms (upper part), and magnified 100 peak (lower part). (b) UV-Vis absorption spectra (Tauc plot in the inset). (c) Steady-state PL from front (perovskite) with a near-UV laser of 405 nm.
